# Supplementary material for: Spinal sagittal alignment changes following cervical manipulation and isometric neck exercise: A retrospective study
Source: Research Square preprint supplement (doi:10.21203/rs.3.rs-8525369/v1), 2026-02-13
Supplement: Supplementary file 1 [file c32712bfd57bbcd753ca1c1d.docx]

Supplementary Table 1. Cervical lordosis category distribution

| Cervical lordosis category | Baseline, n (%) | Post-intervention, n (%) |
| --- | --- | --- |
| Hypolordosis (<35°) | 130 (100%) | 96 (73.8%) |
| Normal (35°–45°) | 0 (0%) | 34 (26.2%) |
